# Supplementary material
Source: HighWire-hosted journal article supplement (https://gut.bmj.com/content/69/11/1988)

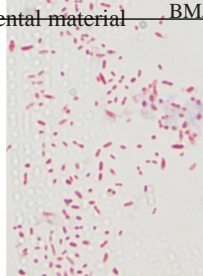

1000 kb  
750 kb

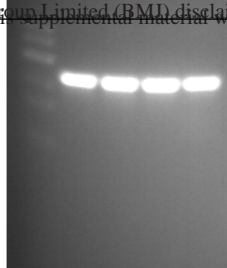

873 kb

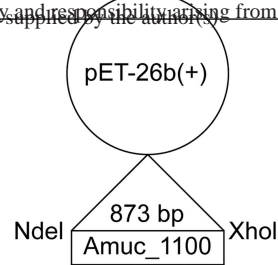

**D**

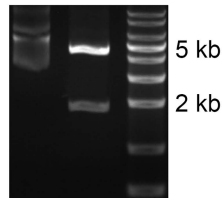

**E**

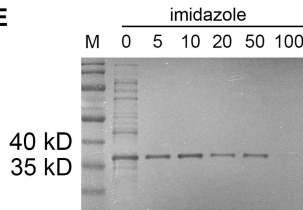

**F**

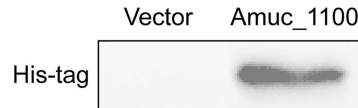

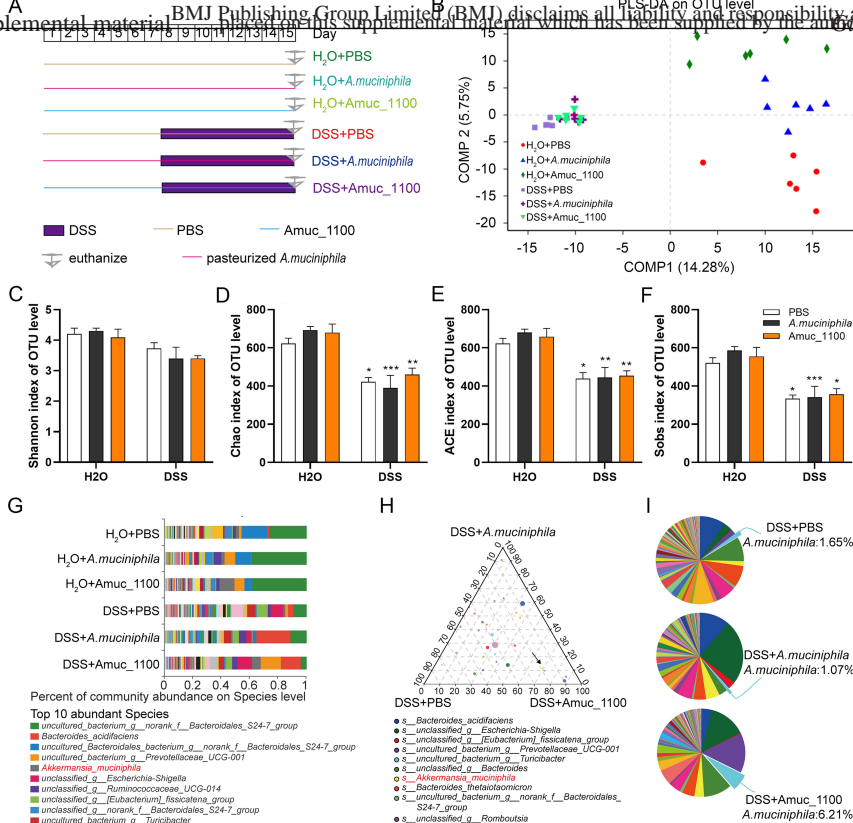

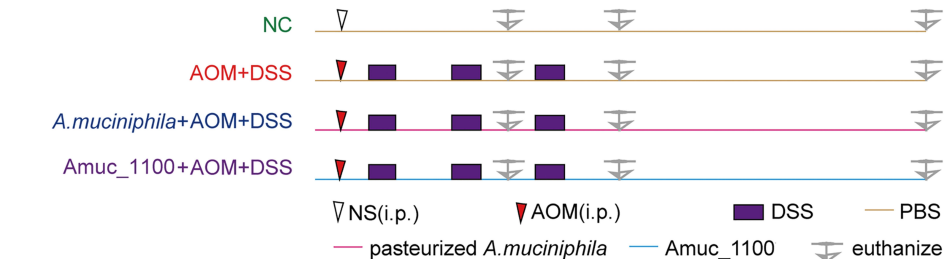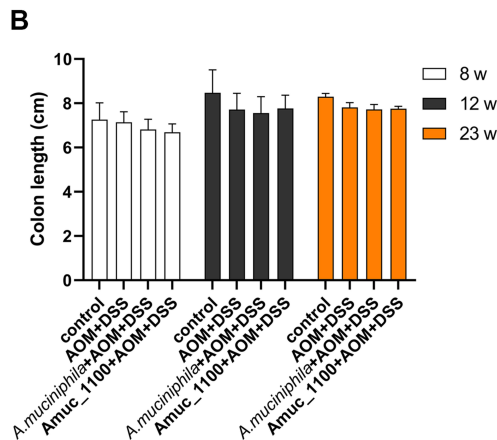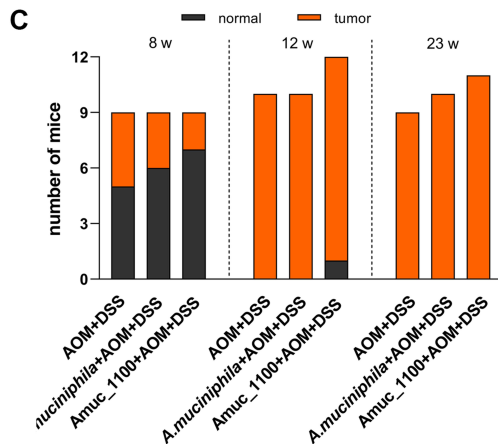

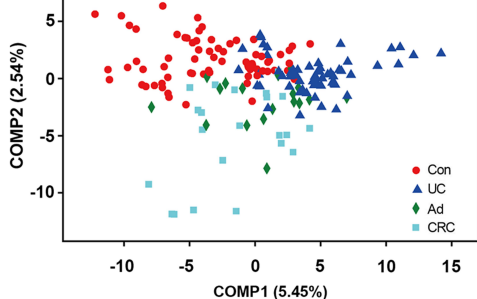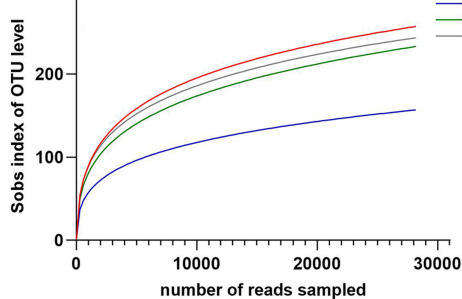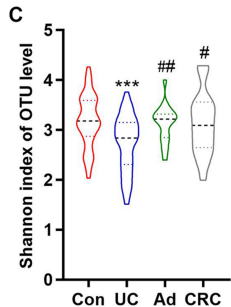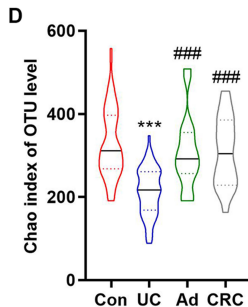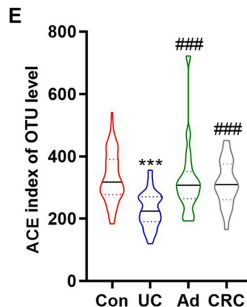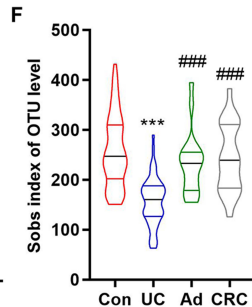

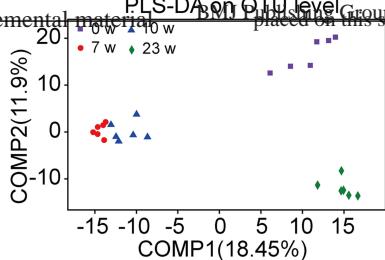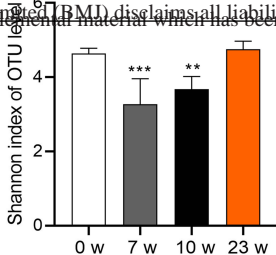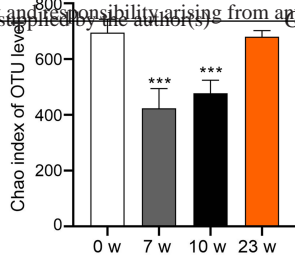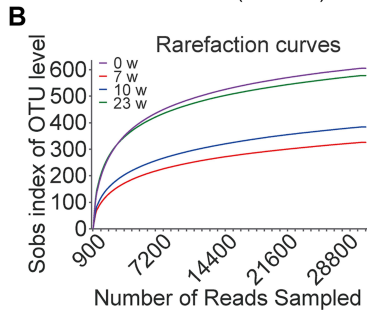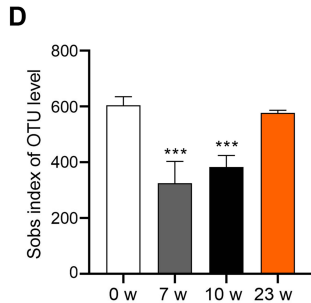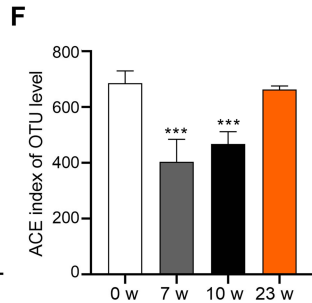

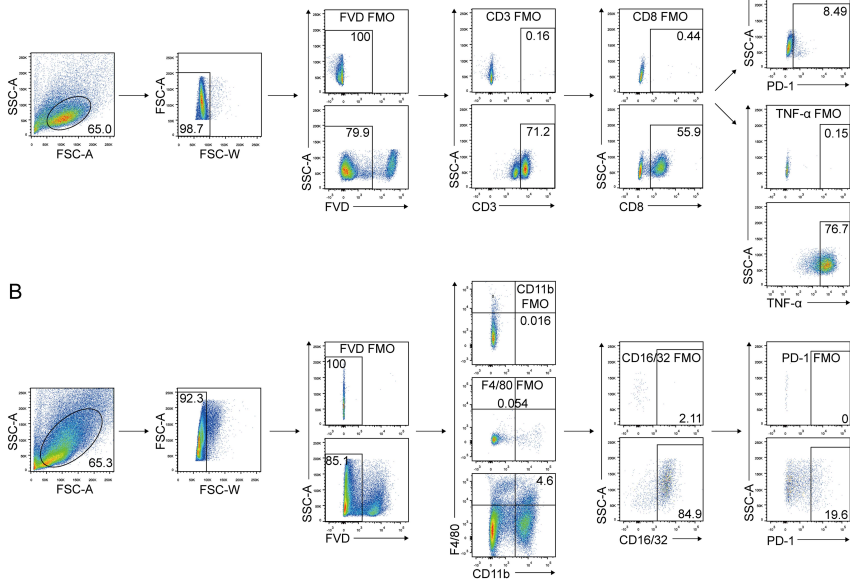

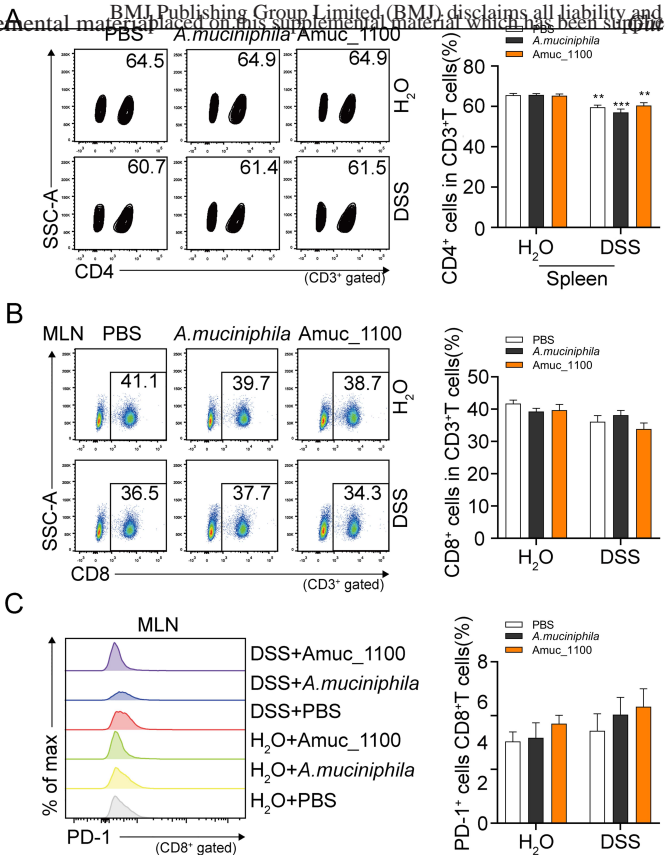

**A**

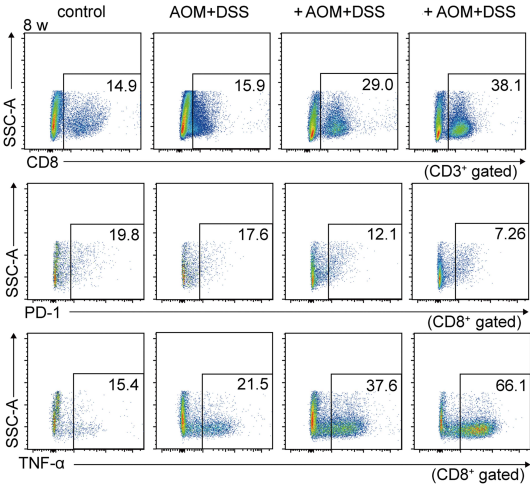

**B**

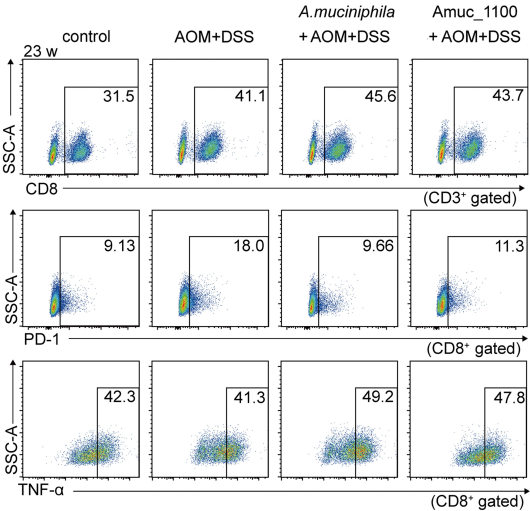



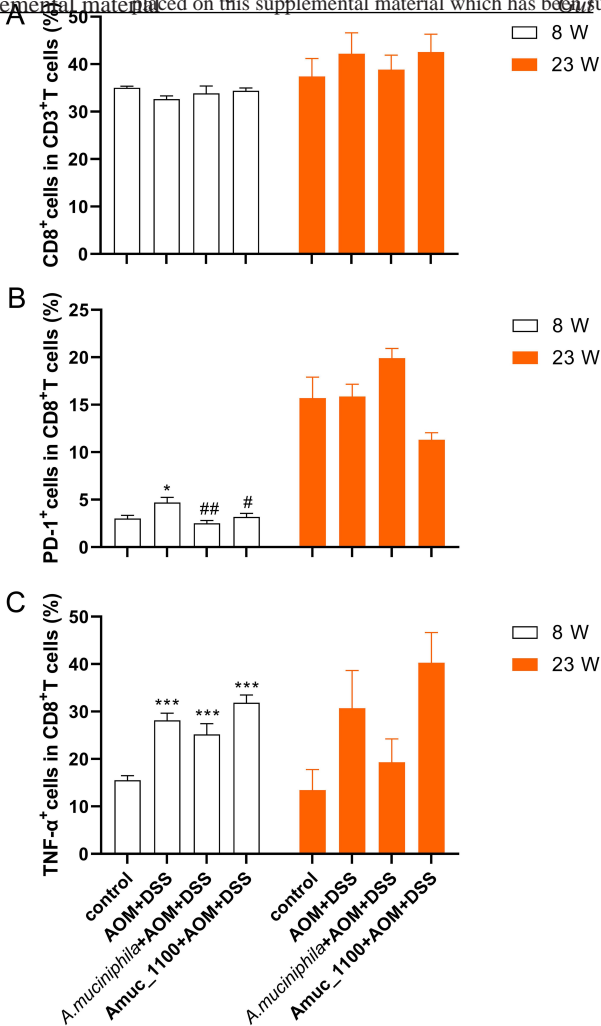

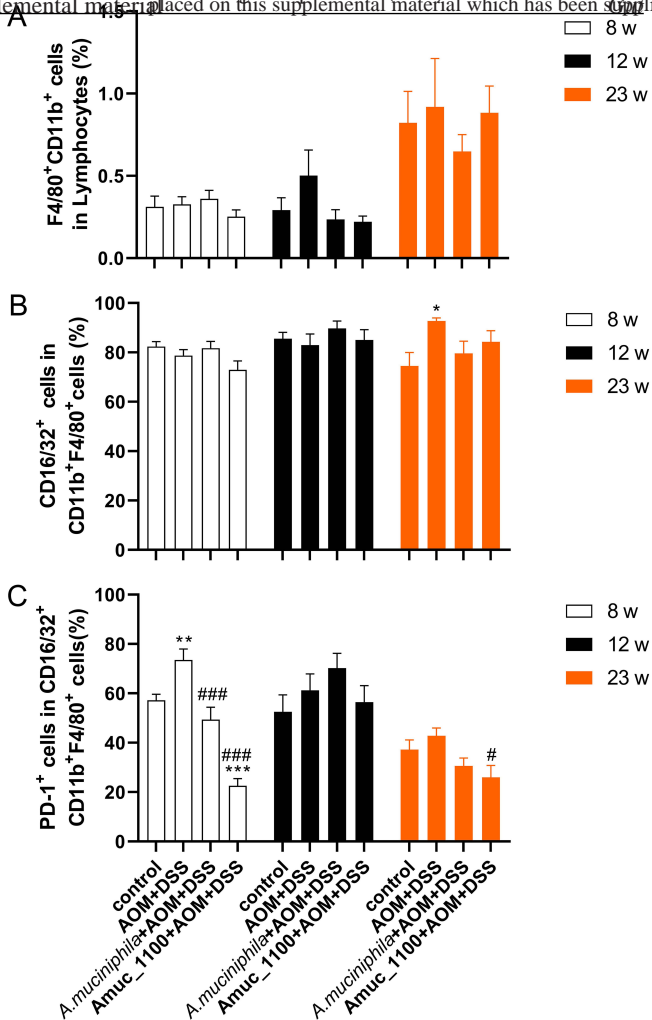

Supplement: inline-supplementary-material-1 [file inline-supplementary-material-1.pdf]
